# Supplementary material for: Remarkable photoluminescence enhancement of CsPbBr3 perovskite quantum dots assisted by metallic thin films
Source: publisher site journal article supplement (doi:10.1515/nanoph-2021-0064), 2020-06-01
Supplement: Supplementary file 1 [file j_nanoph-2021-0064_suppl.pdf]

## **Supplementary Material**

### **Remarkable Photoluminescence Enhancement of CsPbBr<sub>3</sub> Perovskite Quantum Dots Assisted by Metallic Thin Films**

Wenchao Zhao<sup>†</sup>, Zhengji Wen<sup>†</sup>, Qianqian Xu, Ziji Zhou, Shimin Li, Shiyu Fang, Ting Chen,  
Liaoxin Sun, Xingjun Wang, Yufeng Liu\*, Yan Sun, Yan-Wen Tan, Ning Dai and Jiaming Hao\*

<sup>†</sup>These authors contributed equally to this work

\* Email: [yfliu@mail.sitp.ac.cn](mailto:yfliu@mail.sitp.ac.cn); [jiaming.hao@mail.sitp.ac.cn](mailto:jiaming.hao@mail.sitp.ac.cn)

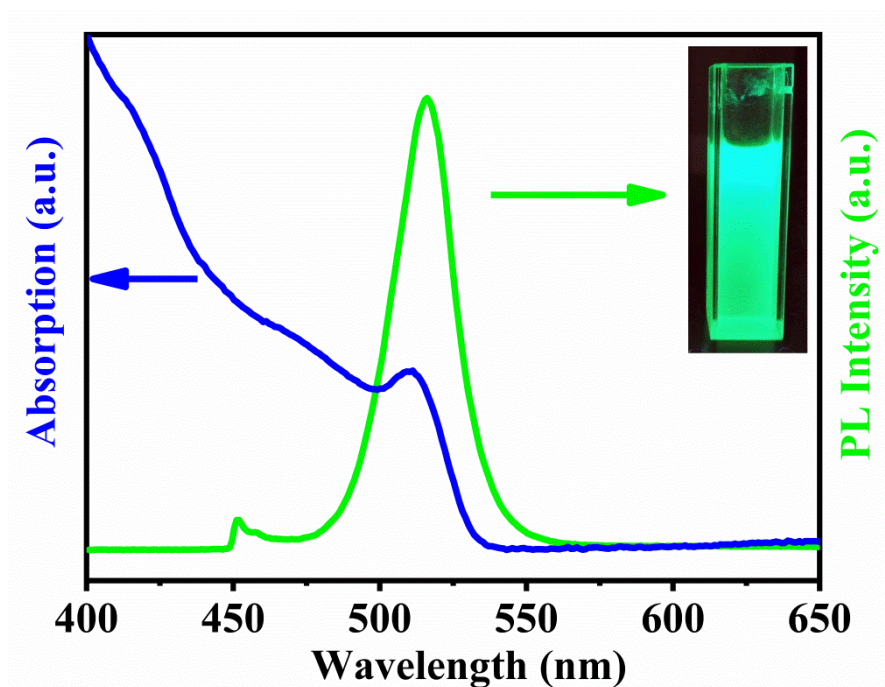

**Figure S1:** UV-vis absorbance (blue line) and PL (green line) spectra of CsPbBr<sub>3</sub> perovskite QDs. Inset: optical images of CsPbBr<sub>3</sub> QDs under a 365 nm UV lamp.

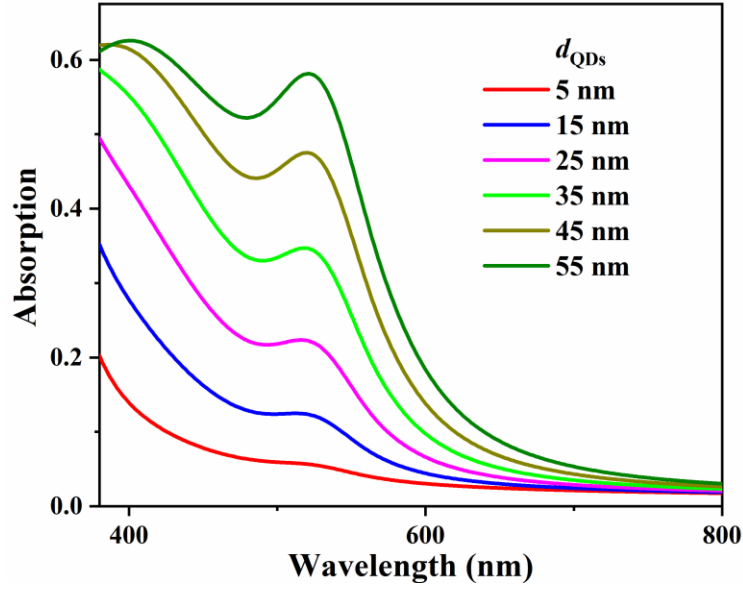

**Figure S2:** Calculated optical absorption spectra for six different thickness of CPB QDs thin films ( $d_{\text{QDs}} = 5, 15, 25, 35, 45$  and  $55$  nm) on a  $60$  nm thickness Ag NP film separated by a  $10$  nm thick  $\text{SiO}_2$  spacer. It is noted that there exists a critical thickness about  $d_{\text{QDs}} = 35$  nm for the absorption enhancement effect.

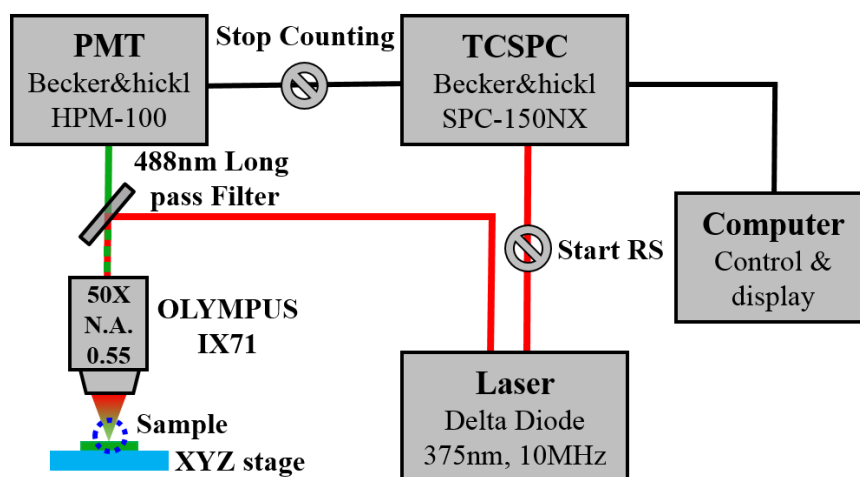

**Figure S3:** Experimental setup for lifetime measurements. PMT, Photomultiplier tube. TCSPC, Time-Correlated Single Photon Counting. RS, Reference Signal.

### **Note 1: Synthesis process of CsPbBr<sub>3</sub> QDs**

The CsPbBr<sub>3</sub> quantum dots used in this experiment are prepared by ourselves, and the process is as follows. Typically, 40 mL of octadecene (ODE), 3 mL of oleic acid (OA) and 1 g of Cs<sub>2</sub>CO<sub>3</sub> were in turn added into a 100 ml of three-neck flask under stirring. Subsequently, the container was degassed under argon flow at 130 °C for 30 min. Then the mixture solution was heated to 150 °C for another 45 min until all Cs<sub>2</sub>CO<sub>3</sub> dissolved in OA and ODE. The solution was labeled as A. In another three neck-flask, 0.4 mmol of PbBr<sub>2</sub>, 1 mL of OA, 1 mL of oleylamine (OAm) and 10 mL of ODE were in turn added into the flask under stirring and degassed under argon flow at 130 °C for 30 min until PbBr<sub>2</sub> dissolved in OA, OAm and ODE (Solution B). Then the temperature was raised to 160 °C and kept for another 10 min. Moreover, 1 mL of solution A was swiftly injected into the solution B. The reaction was terminated with an ice bath after 10 s. The as-prepared quantum dots solution was precipitated by adding 40 ml excess acetone and centrifuged at 8000 rpm for 3 min. The CsPbBr<sub>3</sub> QDs were collected and re-dispersed in 10 mL of n-hexane to form a stable QDs solution.

## Note 2: The calculations of enhancement factor

To give a physical insight in the enhancement mechanisms, we theoretically estimate the enhancement factor with a semi-analytic dyadic Green's function model. Two main parts were considered, one was the normalized rate of energy dissipation on the emission wavelength of QDs and the other was the absorption enhancement at the excitation wavelength of pumped lasers. Therefore, the intensity enhancement factor can be obtained<sup>[S1,S2]</sup>.

$$EF = \frac{Q}{Q_0} \cdot \frac{A}{A_0} \quad (1)$$

Firstly, we calculate the normalized rate of energy dissipation and assume a radiative dipole on top of the structure surface. The dyadic Green's function  $\vec{\vec{G}}_0(\mathbf{r}, \mathbf{r}_0)$  defines the electric field  $\mathbf{E}(\mathbf{r})$  of an electric dipole  $\boldsymbol{\mu}$  located at  $\mathbf{r}_0 = (x_0, y_0, z_0)$  according to<sup>[S3-S5]</sup>:

$$\mathbf{E}(\mathbf{r}) = \omega^2 \mu_0 \mu_1 \vec{\vec{G}}_0(\mathbf{r}, \mathbf{r}_0) \boldsymbol{\mu} \quad (2)$$

Utilizing angular spectrum representation of the dyadic Green's functions allowed us to analyze the contribution of each spatial frequency mode. For a single dipole emitter with in-plane orientation placed at a distance  $z_0$  above a multilayer planar structure, the corresponding normalized rate of energy dissipation can be calculated using the following formulas:

$$\frac{P}{P_0} \Big|_{\parallel} = 1 + \frac{3}{4} \int_0^\infty \text{Re} \left\{ \frac{s}{s_z} \left[ r^s - s_z^2 r^p \right] e^{2ik_0 z_0 s_z} \right\} ds \quad (3)$$

On the other hand, when the single dipole emitter placed with perpendicular orientation, we can get:

$$\frac{P}{P_0} \Big|_{\perp} = 1 + \frac{3}{2} \int_0^\infty \text{Re} \left\{ \frac{s^3}{s_z} r^p e^{2ik_0 z_0 s_z} \right\} ds \quad (4)$$

Then, the value of energy dissipation rate  $P/P_0$  for the statistically averaged dipole orientation is given by:

$$\begin{aligned} \frac{P}{P_0} \Big|_{ave} &= \frac{2}{3} \frac{P}{P_0} \Big|_{\parallel} + \frac{1}{3} \frac{P}{P_0} \Big|_{\perp} \\ &= 1 + \frac{1}{2} \int_0^\infty \text{Re} \left\{ \frac{s}{s_z} \left[ r^s - s_z^2 r^p \right] e^{2ik_0 z \delta_z} \right\} ds + \frac{1}{2} \int_0^\infty \text{Re} \left\{ \frac{s^3}{s_z} r^p e^{2ik_0 z_0 s_z} \right\} ds \end{aligned} \quad (5)$$

In equations (3)-(5), for convenience,  $s = k_{\parallel} / k_0$ ,  $s_z = \sqrt{1-s^2} = k_{\perp} / k_0$ ,  $k_0 = \omega / c$ .

The reflection coefficients  $r^s$  and  $r^p$  for s- and p-polarized waves can be obtained by the transfer matrix method <sup>[S6]</sup>. The integrals are numerically evaluated by using an adaptive Gauss–Kronrod quadrature method <sup>[S7]</sup>.

In addition, for an incoherently decaying quantum system with intrinsic quantum yield  $Q_0$ , the normalized spontaneous decay rate equals to<sup>[S8]</sup>

$$\frac{\Gamma}{\Gamma_0} = 1 - Q_0 + Q_0 \frac{P}{P_0} \quad (6)$$

$$\text{Where,} \quad \Gamma_0 = \Gamma_r + k_{nr} \quad \text{and} \quad \Gamma = \Gamma_r + \Gamma_m + k_{nr} \quad (7)$$

$$\text{On the other hand,} \quad Q_0 = \frac{\Gamma_r}{\Gamma_r + k_{nr}} \quad \text{and} \quad Q = \frac{\Gamma_r + \Gamma_m}{\Gamma_r + \Gamma_m + k_{nr}} \quad (8)$$

Finally, combining equations (5)-(8), the radiative rate and quantum efficiency at the emission wavelength  $Q/Q_0$  can be obtained.

Next step, we calculate the absorption enhancement factor due to the presence of the metallic layer through full-wave numerical simulations using the commercial package Lumerical FDTD Solutions, based on FDTD method. Transmission and reflection were respectively collected with power monitors behind the incident wave and the structure. Two-dimensional field profile monitors were utilized to record electromagnetic field distributions. The absorption of QDs on bare quartz substrate substrates  $Q_0$  and on real samples  $Q$  can be obtained through numerical simulations. Finally, the absorption enhancement at the excitation wavelength  $A/A_0$  can thus be obtained.

## References

- [S1] J. Kim, et al, ACS Nano 14, 11985-11994 (2020).
- [S2] G. Akselrod et al, Nano Letters 15, 3578-3584 (2015).
- [S3] L. Novotny and B. Hecht, Principles of Nano-Optics (Cambridge University Press, Cambridge, 2006).
- [S4] B. Peng et. al, Nanoscale **6**, 5592-5598 (2014).
- [S5] M. Y. Shalaginov et. al, Laser & Photonics Reviews **9**, 120-127 (2015).
- [S6] P. Yeh, Optical waves in layered media (Wiley, New York, 1988).
- [S7] L. F. Shampine, J. Comput. Appl. Math. 211, 131-140 (2008).
- [S8] W. Zhao et al, Advanced Materials 28, 2709-2715 (2016).
